# Supplementary material for: Integrated approach for identifying and evaluating the quality of Marsdenia tenacissima in the medicine market
Source: PubMed Central journal article supplement (PMC5889066; doi:10.1371/journal.pone.0195240), 2018-04-06
Supplement: pone.0195240.s001.pdf [file pone.0195240.s001.pdf]

**S1 Table. Plant materials analyzed in this study.**

| Species               | Voucher NO. | GenBank NO. | Collection Place                      | Identification Result |
|-----------------------|-------------|-------------|---------------------------------------|-----------------------|
| <i>M. tenacissima</i> | TG001       | KY964343    | Drug store, Xi'an, Shanxi             | Genuine               |
| <i>M. tenacissima</i> | TG002       | KY964344    | Drug store, Xi'an, Shanxi             | Genuine               |
| <i>M. tenacissima</i> | TG003       | KY964345    | Drug store, Xi'an, Shanxi             | Genuine               |
| <i>M. tenacissima</i> | TG004       | KY964346    | Drug store, Xi'an, Shanxi             | Genuine               |
| <i>M. tenacissima</i> | TG005       | KY964347    | Drug store, Xi'an, Shanxi             | Genuine               |
| <i>M. tenacissima</i> | TG006       | KY964348    | Yuzhou Medicine Market, Yuzhou, Henan | Genuine               |
| <i>M. tenacissima</i> | TG007       | KY964401    | Yuzhou Medicine Market, Yuzhou, Henan | Fake                  |
| <i>M. tenacissima</i> | TG008       | KY964349    | Yuzhou Medicine Market, Yuzhou, Henan | Genuine               |
| <i>M. tenacissima</i> | TG009       | KY964350    | Yuzhou Medicine Market, Yuzhou, Henan | Genuine               |
| <i>M. tenacissima</i> | TG010       | KY964351    | Drug store, Jiangxi                   | Genuine               |
| <i>M. tenacissima</i> | TG011       | KY964352    | Anguo Medicine Market, Baoding, Hebei | Genuine               |
| <i>M. tenacissima</i> | TG012       | KY964353    | Anguo Medicine Market, Baoding, Hebei | Genuine               |
| <i>M. tenacissima</i> | TG013       | KY964354    | Anguo Medicine Market, Baoding, Hebei | Genuine               |
| <i>M. tenacissima</i> | TG014       | KY964355    | Anguo Medicine Market, Baoding, Hebei | Genuine               |
| <i>M. tenacissima</i> | TG015       | KY964356    | Anguo Medicine Market, Baoding, Hebei | Genuine               |
| <i>M. tenacissima</i> | TG016       | KY964357    | Anguo Medicine Market, Baoding, Hebei | Genuine               |
| <i>M. tenacissima</i> | TG017       | KY964358    | Anguo Medicine Market, Baoding, Hebei | Genuine               |
| <i>M. tenacissima</i> | TG018       | ---         | Anguo Medicine Market, Baoding, Hebei | Genuine               |
| <i>M. tenacissima</i> | TG019       | ---         | Drug store, Yunnan                    | Genuine               |
| <i>M. tenacissima</i> | TG020       | KY964359    | Drug store, Yunnan                    | Genuine               |
| <i>M. tenacissima</i> | TG021       | KY964360    | Drug store, Yunnan                    | Genuine               |
| <i>M. tenacissima</i> | TG022       | KY964361    | Drug store, Yunnan                    | Genuine               |
| <i>M. tenacissima</i> | TG023       | KY964362    | Drug store, Yunnan                    | Genuine               |

---

|                       |       |          |                                       |         |
|-----------------------|-------|----------|---------------------------------------|---------|
| <i>M. tenacissima</i> | TG024 | KY964363 | Drug store, Yunnan                    | Genuine |
| <i>M. tenacissima</i> | TG025 | KY964364 | Drug store, Yunnan                    | Genuine |
| <i>M. tenacissima</i> | TG026 | KY964365 | Drug store, Yunnan                    | Genuine |
| <i>M. tenacissima</i> | TG027 | KY964366 | Drug store, Yunnan                    | Genuine |
| <i>M. tenacissima</i> | TG028 | —        | Bozhou Medicine Market, Bozhou, Anhui | Genuine |
| <i>M. tenacissima</i> | TG029 | KY964367 | Bozhou Medicine Market, Bozhou, Anhui | Genuine |
| <i>M. tenacissima</i> | TG030 | KY964368 | Bozhou Medicine Market, Bozhou, Anhui | Genuine |
| <i>M. tenacissima</i> | TG031 | KY964369 | Bozhou Medicine Market, Bozhou, Anhui | Genuine |
| <i>M. tenacissima</i> | TG032 | KY964370 | Bozhou Medicine Market, Bozhou, Anhui | Genuine |
| <i>M. tenacissima</i> | TG033 | KY964371 | Bozhou Medicine Market, Bozhou, Anhui | Genuine |
| <i>M. tenacissima</i> | TG034 | KY964372 | Bozhou Medicine Market, Bozhou, Anhui | Genuine |
| <i>M. tenacissima</i> | TG035 | KY964373 | Bozhou Medicine Market, Bozhou, Anhui | Genuine |
| <i>M. tenacissima</i> | TG036 | KY964374 | Drug store, Shanghai                  | Genuine |
| <i>M. tenacissima</i> | TG037 | KY964375 | Drug store, Shanghai                  | Genuine |
| <i>M. tenacissima</i> | TG038 | KY964376 | Drug store, Shanghai                  | Genuine |
| <i>M. tenacissima</i> | TG039 | KY964377 | Drug store, Shanghai                  | Genuine |
| <i>M. tenacissima</i> | TG040 | KY964378 | Drug store, Shanghai                  | Genuine |
| <i>M. tenacissima</i> | TG041 | KY964379 | Drug store, Guizhou                   | Genuine |
| <i>M. tenacissima</i> | TG042 | KY964380 | Drug store, Guizhou                   | Genuine |
| <i>M. tenacissima</i> | TG043 | KY964381 | Drug store, Guizhou                   | Genuine |
| <i>M. tenacissima</i> | TG044 | KY964382 | Drug store, Xingning, Guangdong       | Genuine |
| <i>M. tenacissima</i> | TG045 | KY964383 | Drug store, Xingning, Guangdong       | Genuine |
| <i>M. tenacissima</i> | TG046 | KY964384 | Drug store, Xingning, Guangdong       | Genuine |
| <i>M. tenacissima</i> | TG047 | KY964385 | Drug store, Xingning, Guangdong       | Genuine |
| <i>M. tenacissima</i> | TG048 | KY964386 | Drug store, Xingning, Guangdong       | Genuine |
| <i>M. tenacissima</i> | TG049 | KY964387 | Drug store, Xingning, Guangdong       | Genuine |

---

|                       |       |            |                                 |         |
|-----------------------|-------|------------|---------------------------------|---------|
| <i>M. tenacissima</i> | TG050 | KY964388   | Drug store, Xingning, Guangdong | Genuine |
| <i>M. tenacissima</i> | TG051 | KY964389   | Drug store, Cheng du, Sichuan   | Genuine |
| <i>M. tenacissima</i> | TG052 | KY964390   | Drug store, Cheng du, Sichuan   | Genuine |
| <i>M. tenacissima</i> | TG053 | KY964391   | Drug store, Cheng du, Sichuan   | Genuine |
| <i>M. tenacissima</i> | TG054 | KY964392   | Drug store, Cheng du, Sichuan   | Genuine |
| <i>M. tenacissima</i> | TG055 | KY964393   | Drug store, Cheng du, Sichuan   | Genuine |
| <i>M. tenacissima</i> | TG056 | KY964394   | Drug store, Yulin, Guangxi      | Genuine |
| <i>M. tenacissima</i> | TG057 | KY964395   | Drug store, Yulin, Guangxi      | Genuine |
| <i>M. tenacissima</i> | TG058 | KY964396   | Drug store, Yulin, Guangxi      | Genuine |
| <i>M. tenacissima</i> | TG059 | KY964397   | Drug store, Yulin, Guangxi      | Genuine |
| <i>M. tenacissima</i> | TG060 | KY964398   | Drug store, Yulin, Guangxi      | Genuine |
| <i>M. tenacissima</i> | TG061 | KY964399   | Drug store, Yulin, Guangxi      | Genuine |
| <i>M. tenacissima</i> | TG062 | KY964400   | Drug store, Yulin, Guangxi      | Genuine |
| <i>M. tenacissima</i> | ---   | GQ434576.1 | GenBank                         | ---     |
| <i>T. cordata</i>     | ---   | AM980873.1 | GenBank                         | ---     |
| <i>F. polyanthum</i>  | ---   | KP096047.1 | GenBank                         | ---     |
| <i>T. sinensis</i>    | ---   | KR425497.1 | GenBank                         | ---     |
